# Supplementary material for: Dilute lattice doping of 64Cu into 2D-nanoplates: its impact on radio-labeling efficiency and stability for target selective PET imaging
Source: Royal Society of Chemistry journal article supplement (doi:10.1039/d2tb01165d), 2022-01-01
Supplement: d2tb01165d1.pdf [file d2tb01165d1.pdf]

## 1 **Supplementary Information (SI)**

2 Dilute lattice doping of  $^{64}\text{Cu}$  into 2D-nanoplate; its impact on radio-  
3 labeling efficiency and stability for target selective PET imaging

4 *Sairan Eom, <sup>a,b</sup> Min Hwan Kim, <sup>b</sup> Ranji Yoo, <sup>b</sup> Goeun Choi, <sup>c,d,e</sup> Joo Hyun Kang, <sup>b</sup> Yong Jin Lee,*  
5 *<sup>b</sup> and Jin-Ho Choy\*<sup>c,f,g</sup>*

6 <sup>a</sup>Center for Intelligent Nano-Bio Materials (CINBM), Department of Chemistry and  
7 Nanoscience, Ewha Womans University, Seoul 03760, Republic of Korea

8 <sup>b</sup>Division of Applied-RI, Korea Institute of Radiological and Medical Sciences, Seoul 01812,  
9 Republic of Korea

10 <sup>c</sup>Intelligent Nanohybrid Materials Laboratory (INML), Institute of Tissue Regeneration  
11 Engineering (ITREN), Dankook University, Cheonan 31116, Republic of Korea

12 <sup>d</sup>College of Science and Technology, Dankook University, Cheonan 31116, Republic of  
13 Korea.

14 <sup>e</sup>Department of Nanobiomedical Science and BK21 PLUS NBM Global Research Center for  
15 Regenerative Medicine, Dankook University, Cheonan 31116, Republic of Korea.

16 <sup>f</sup>Department of Pre-medical Course, College of Medicine, Dankook University, Cheonan  
17 31116, Republic of Korea

18 <sup>g</sup>Tokyo Tech World Research Hub Initiative (WRHI), Institute of Innovative Research,  
19 Tokyo Institute of Technology, Yokohama 226-8503, Japan

20 \*Corresponding author. E-mail: [jhchoy@dankook.ac.kr](mailto:jhchoy@dankook.ac.kr)

21

## 22 **S1. Materials and Methods**

23

### 24 **S1. 1 Synthesis of the $^{64}\text{Cu}$ radioisotope physically adsorbed on QT-NPs, $^{64}\text{Cu}$ -ads-QT-** 25 **NPs and the BSA coated, $^{64}\text{Cu}$ -ads-QT-NPs/BSA as the control groups.**

26         In order to compare the radiolabeling efficiency and stability of  $^{64}\text{Cu}$  isomorphically  
27 doped into QT-NPs with those of  $^{64}\text{Cu}$  physically adsorbed on external surface of QT-NPs,  
28 the two control samples,  $^{64}\text{Cu}$ -ads-QT-NPs and  $^{64}\text{Cu}$ -ads-QT-NPs/BSA were prepared as  
29 follows [1]; QT-NPs were synthesized by hydrothermal method at 100 °C for 12 h, and thus  
30 prepared suspension (15 mg/mL) was added into 0.1M sodium acetate solution (pH = 5.5)  
31 containing ~ 185 MBq of  $^{64}\text{Cu}$  radioisotopes. And then the mixed solution was treated under  
32 a constant shaking condition at 37 °C for 3 h.

33

### 34 **S1. 2 *In-vitro* cytotoxicity study of $^{64}\text{Cu}$ -QT-NPs and $^{64}\text{Cu}$ -QT-NPs/BSA**

35         The human breast cancer cell line (MDA-MB-231) was purchased from the  
36 American Type Culture Collection (ATCC) and cultured in the Roswell Park Memorial  
37 Institute (RPMI) 1640 medium (WelGENE, Republic of Korea) with 10 % fetal bovine serum  
38 (FBS) and 1 % antibiotics (both by Invitrogen, USA) under an atmosphere of 5 %  $\text{CO}_2$  and  
39 95 % air at 37 °C. To investigate cell viability based on trypan blue exclusion assay, the  
40 MDA-MB-231 cells were seeded onto 24-well plates ( $5 \times 10^4$  cells/well), incubated at 37 °C  
41 for ~12 h under a 5%  $\text{CO}_2$  atmosphere, and finally exposed to the samples Cu-QT-NPs, and  
42 Cu-QT-NPs/BSA, respectively, in the concentration range of 1–100  $\mu\text{g/mL}$  and further  
43 incubated for 48h. After incubation at the progress time, the cells were washed twice with  
44 phosphate-buffered saline (PBS), and detached with 0.1 % trypsin. The detached cells were  
45 collected in the media, and 20  $\mu\text{L}$  of cell suspension was diluted with 20  $\mu\text{L}$  of 0.4 % trypan

46 blue. Finally, viable cells were counted within the grids on hemacytometer, and their cell  
47 viability (%) was calculated as the following equation;

48 
$$\text{Cell viability (\%)} = \frac{\text{Total number of viable cells}}{\text{Total number of cells}} \times 100$$

49

50

### 51 **S1. 3 *In-vivo* toxicology study of Cu-QT-NPs**

52 Cu-QT-NPs (10 mg/kg) and saline (100 µl) were intravenously injected to the normal  
53 BALB/c mice. The liver and spleen of mice were harvested at 1 week after injection, and then  
54 the tissues were stained with H&E (Hematoxylin and Eosin) to confirm histopathology.

55

56

## 57 S2. Additional data

58

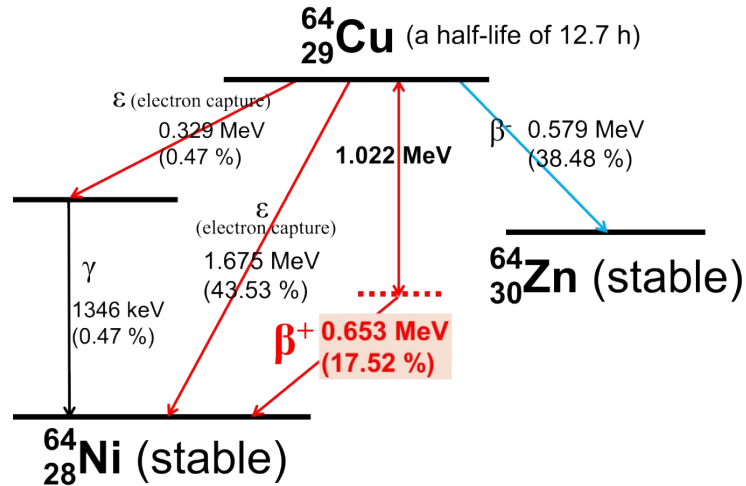

59

60 **Fig. S1** Decay scheme of  $^{64}\text{Cu}$  radioisotope [2].

61

62 The  $^{64}\text{Cu}$  radioisotope can be produced from proton irradiation on  $^{64}\text{Ni}$  target in a medical  
 63 cyclotron using  $^{64}\text{Ni}(p, n)^{64}\text{Cu}$  reaction [3].  $^{64}\text{Cu}$  radioisotope with a half-life of 12.7 h is  
 64 quite useful for PET imaging and for radiotherapeutic applications due to its decay mode of  
 65  $\beta^+$  (18 %),  $\beta^-$  (38.5 %), and electron capture ( $\epsilon$ , 43.5 %) of as illustrated in Fig. S1.

66

67

68

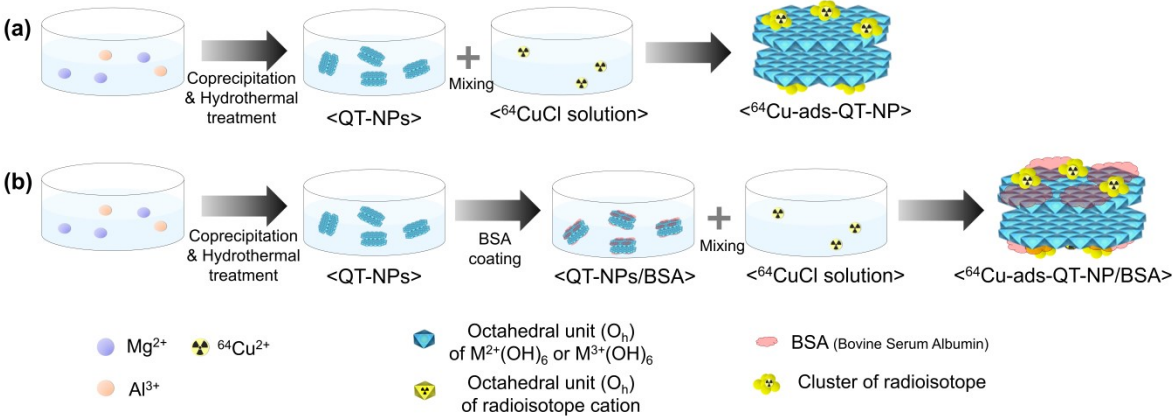

69

70 **Fig. S2** Structural schemes for the physisorbed  $^{64}\text{Cu}$  on external surface of QT-NP (a)  $^{64}\text{Cu}$ -  
71 ads-QT-NP, and its BSA coated (b)  $^{64}\text{Cu}$ -ads-QT-NP/BSA.

72

73

74

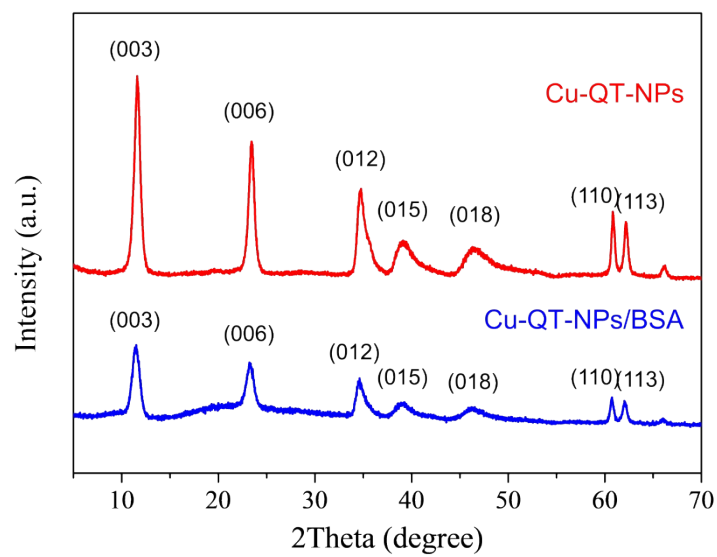

75

76

77 **Fig. S3** Powder XRD patterns for Cu-QT-NPs and Cu-QT-NPs/BSA.

78

79

80

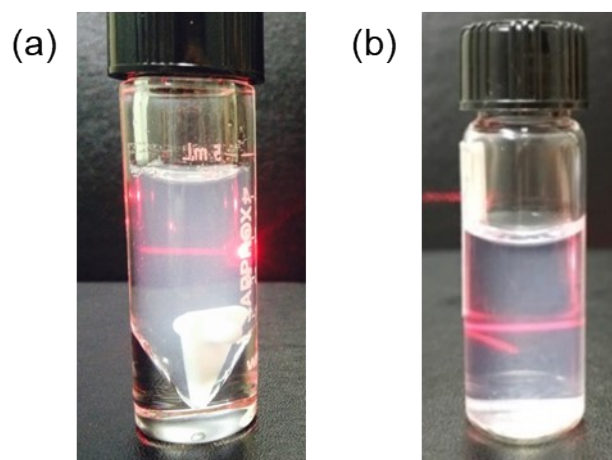

81

82 **Fig. S4** Colloidal (a) Cu-QT-NPs and (b) Cu-QT-NPs/BSA images.

83

84

85

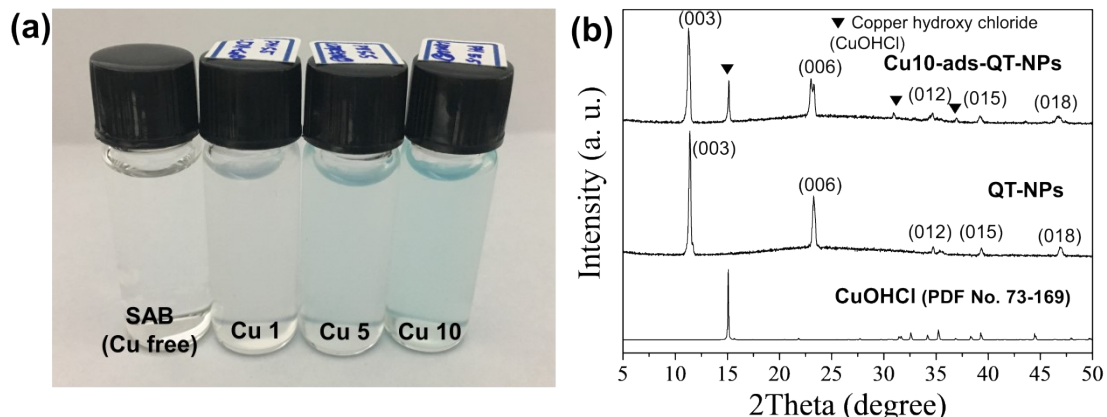

86

87 **Fig. S5** (a) Images for sodium acetate buffer (SAB) (pH = 5.5) and mixture solution of QT-  
 88 NPs suspension and SAB containing different concentration of Cu(II)Cl<sub>2</sub> (Cu1, Cu5, Cu10).  
 89 (b) Powder XRD patterns of copper chloride hydroxide (CuOHCl) as an undesired (impurity)  
 90 phase formed on QT-NPs in Cu10 solution.

91

92 The <sup>64</sup>Cu radioisotope physically adsorbed on QT-NPs, <sup>64</sup>Cu-ads-QT-NPs, showed the low  
 93 chemical stability ( $63.4 \pm 0.99\%$ ) as expected, due to the fact that the <sup>64</sup>Cu phase was weakly  
 94 bound on the external surface of QT-NPs. But it has not been well understood so far what  
 95 kind of <sup>64</sup>Cu phase was formed on the surface of QT-NPs, and why its labeling stability was  
 96 so poor [1]. This is surely due to the difficulty in characterizing such an unknown <sup>64</sup>Cu  
 97 surface phase with doping amount on QT-NPs. And therefore, its chemical and structural  
 98 information were not available as yet, since the doped phase cannot be detected by XRD  
 99 analyzer due to its detection limit of < 5%. In order to define the unknown surface phase, we  
 100 attempted to prepare the non-labeled QT-NPs (Cu-ads-QT-NPs) under the same synthetic  
 101 condition where excess CuCl<sub>2</sub> was given as presented in Fig. S5.



102 At first, QT-NPs were synthesized under a hydrothermal condition of 100 °C and 12 h, and  
103 thus prepared suspension was added into the sodium acetate buffer (SAB, 0.1 M) solution  
104 (pH = 5.5) with different concentrations of CuCl<sub>2</sub> solution (0.1 M). And the mixed solution  
105 was kept at 37 °C for 3 h under stirring condition. As shown in Fig. S4(a), Cu1, Cu5 and  
106 Cu10 represented the mixed SAB solution containing CuCl<sub>2</sub>, corresponding to the  
107 Cu(II)/Mg(II) molar ratio of 0.01, 0.05, and 0.10, respectively. Since the detection limit of  
108 XRD analyzer is < 5 %, no significant impurity was observed in the XRD pattern for QT-NPs  
109 with the molar ratio of 0.01 and 0.05. On the other hand, the impurity peak corresponding to  
110 the copper hydroxychloride (CuOHCl, PDF No. 73-169) could be detected for QT-NPs with  
111 the molar ratio of 0.10, indicating that the Cu(II) ions were physically adsorbed on the  
112 external surface of QT-NPs, as the form of CuOHCl. It is, therefore, concluded that the  
113 unknown phase containing <sup>64</sup>Cu radioisotope physically adsorbed on the surface of QT-NPs  
114 was neither copper oxide (CuO) nor copper hydroxide (Cu(OH)<sub>2</sub>), but CuOHCl (Fig. S2(a)  
115 and Fig. S5(b)).

116

117

118

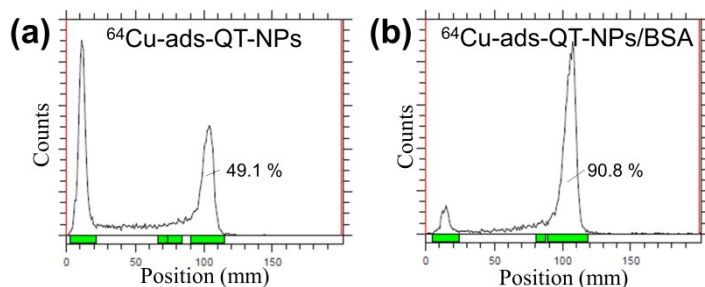

119

120 **Fig. S6** The radio-TLC graphs of (a) <sup>64</sup>Cu-ads-QT-NPs and (b) <sup>64</sup>Cu-ads-QT-NPs/BSA.

121

122 The labeling efficiency of <sup>64</sup>Cu-ads-QT-NPs and <sup>64</sup>Cu-ads-QT-NPs/BSA were investigated  
 123 by radio-TLC using a 20 mM sodium citrate/50 mM EDTA solution (pH = 5.5) as a mobile  
 124 phase. According to the radio-TLC results (Fig. S6), <sup>64</sup>Cu radioisotopes physically adsorbed  
 125 on QT-NPs were easily released from <sup>64</sup>Cu-ads-QT-NPs and <sup>64</sup>Cu-ads-QT-NPs/BSA by the  
 126 mobile phase, because the labeling efficiency for the former was determined to be 50.9 %  
 127 indicating that the detached <sup>64</sup>Cu phase reached to 49.1 % due to its weak bonding with the  
 128 external surface of QT-NPs as shown in Fig. S6(a). In the latter case, the labeling efficiency  
 129 became extremely lower down to 9.2 % upon BSA coating; 90.8 % of <sup>64</sup>Cu radioisotopes  
 130 were detached from <sup>64</sup>Cu-ads-QT-NPs/BSA. Different from the present isomorphically  
 131 substituted phases, such low labeling efficiencies of the physically adsorbed ones, <sup>64</sup>Cu-ads-  
 132 QT-NPs and <sup>64</sup>Cu-ads-QT-NPs/BSA, could be explained by the fact that <sup>64</sup>Cu radioisotopes  
 133 were formed on external surface of QT-NPs as unknown amorphous phases, such as CuO and  
 134 Cu(OH)<sub>2</sub>, including nano-crystalline CuOHCl as clearly demonstrated in the present study.  
 135 According to the literature [4], CuOHCl is highly soluble at low pH (2.2), and expected to be

136 partly dissolved in the mobile phase with  $\text{pH} = 5.5$ . The labeling stability, therefore, cannot  
137 be expected from the adsorbed phases by simple mixing QT-NPs with  $^{64}\text{Cu}$  radioisotope.

139

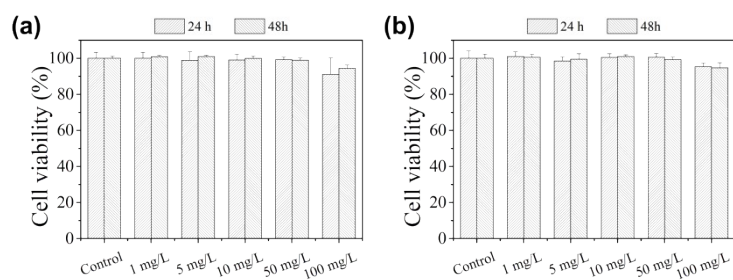

140

141 **Fig. S7** *In-vitro* cytotoxicity of (a) Cu-QT-NPs and (b) Cu-QT-NPs/BSA on the human breast  
142 cancer cell line (MDA-MB-231) for 24 and 48 h.

143

144

145

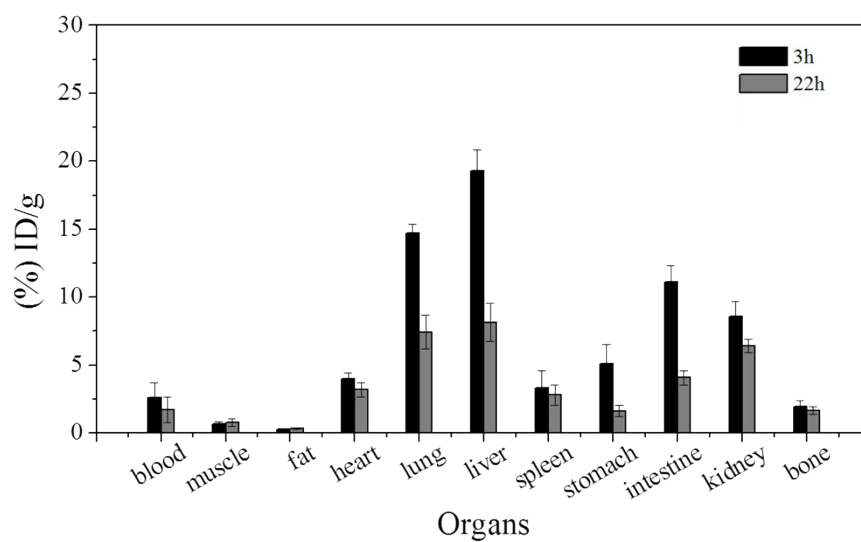

146

147 **Fig. S8** *In-vivo* biodistribution of  $^{64}\text{Cu}$  for 3 and 22 h after *i.v.* injection. It was performed on  
 148 BALB/c normal mouse model ( $n = 3$ ), and the %ID/g for each organ was calculated using  
 149 equation (3).

150

151

152

153

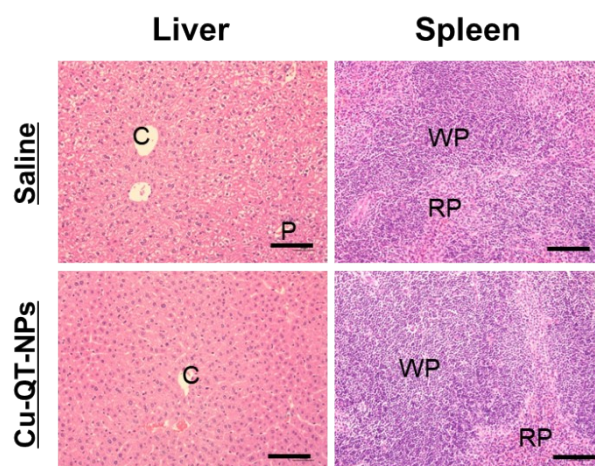

154

155

156 **Fig. S9** *In-vivo* toxicology; H&E staining of liver and spleen of mice at 1 week after injection  
157 with saline and Cu-QT-NPs. (Scale bar: 100  $\mu$ m), (C: central vein, P: portal vein, RP: red  
158 pulp, WP: white pulp)

159

160

161 **Table S1** Labeling efficiencies and stabilities of various <sup>64</sup>Cu-labeled nanomaterials

| Complexes                                          | Labeling radioactivity<br>(or spatial activity) | Labeling efficiency | Labeling stability       | Ref. |
|----------------------------------------------------|-------------------------------------------------|---------------------|--------------------------|------|
| <sup>64</sup> Cu-NOTA <sup>1)</sup> -inhibitor     | 3-4 mCi (78-246 mCi/μmol)                       | 65-70 %             |                          | [5]  |
| <sup>64</sup> Cu-PCTA <sup>2)</sup> -inhibitor     | 3-4 mCi (78-246 mCi/μmol)                       | 70-90 %             |                          | [5]  |
| <sup>64</sup> Cu-Oxo-DO3A <sup>3)</sup> -inhibitor | 3-4 mCi (78-246 mCi/μmol)                       | 75-85 %             |                          | [5]  |
| <sup>64</sup> Cu-CB-TE2A <sup>4)</sup> -inhibitor  | 3-4 mCi (78-246 mCi/μmol)                       | 30-45 %             |                          | [5]  |
| <sup>64</sup> Cu-DOTA <sup>5)</sup> -inhibitor     | 3-4 mCi (78-246 mCi/μmol)                       | 65-70 %             |                          | [5]  |
| <sup>64</sup> Cu-NOTA-BBN <sup>6)</sup>            | -                                               | > 90 %              |                          | [6]  |
| <sup>64</sup> Cu-NOTA-FHT <sup>7)</sup>            | 2 mCi (270-810 μCi/nmol)                        | > 95 %              |                          | [7]  |
| <sup>64</sup> Cu-DOTA-FA <sup>8)</sup> -dendrimer  | 1-3 mCi<br>(34 μCi/nmol)                        | >85 %               | 93.9 % (20 h)            | [8]  |
| <sup>64</sup> Cu-DOTA-mAb7                         | 1 mCi (6 μCi/μg)                                | 71.9 %              | 90.6 (24 h) 88.7 (48 h)  | [9]  |
| <sup>64</sup> Cu-NODAGA <sup>9)</sup> -mAb7        | 1 mCi (5 μCi/μg)                                | 59.3 %              | 93.4 (24 h) 84.5 (48 h)  | [9]  |
| <sup>64</sup> Cu-TETA-OC <sup>10)</sup>            | (~ 1500 mCi/μg)                                 | > 95 %              |                          | [10] |
| <sup>64</sup> Cu-DOTA-rituximab                    | 1 mCi                                           | 98.9 %              | 54 % (24 h), 26 % (48 h) | [11] |
| <sup>64</sup> Cu-DTPA <sup>11)</sup> -rituximab    | 1 mCi                                           | 74.5 %              | 14 % (48 h)              | [11] |
| <sup>64</sup> Cu-DOTA-SPIO <sup>12)</sup>          | 3 mCi<br>(54-108 mCi/mmol)                      | 94 %                | 97.5 % (24 h)            | [12] |
| <sup>64</sup> Cu-DOTA-Au                           | 5.76 mCi                                        | 81.3 %              |                          | [13] |
| <sup>64</sup> Cu-NOTA-Au                           | 1 mCi (20 mCi/nmol)                             | 60-70 %             |                          | [14] |

162 \* 1 mCi = 3.7 x 10<sup>7</sup> Bq

163 1) NOTA: 1,4,7-triazacyclononane-N,N',N''-triacetic acid

164 2) PCTA: 3,6,9,15-tetraazabicyclo[9.3.1]-pentadeca-1(15),11,13-triene)-3,6,9-triacetic acid

165 3) Oxo-DO3A: oxa4,7,1-tetraazacyclododecane-4,7,10-triacetic acid

166 4) CB-TE2A: 1,4,8,11-tetraazabicyclo[6.6.2]hexadecane-4,11-diacetic acid

167 5) DOTA: 1,4,7,10-tetraazacyclododecane-N,N',N'',N'''-tetraacetic acid

168 6) BBN: bombesin

169 7) FHT: dodecapeptide (Phe-His-Thr-Pro-Ser-Gln-Asn-Ser-Ala-Phe-Arg-Leu)

- 170 8) FA: Folic acid
- 171 9) NODAGA: 1,4,7-triazacyclononane,1-glutaric acid,4,7-acetic acid
- 172 10) TETA-OC: 1,4,8,11-tetraazacyclotetradecane-N,N',N'',N'''-tetraacetic acid- D-Phe<sup>1</sup>-  
173 octreotide
- 174 11) DTPA: diethylene triamine penta acetic acid
- 175 12) SPIO: superparamagnetic iron oxide



**Table S2** Time-dependent radioactivities for tumors, muscles, liver, and blood after *i.v.* injection of  $^{64}\text{Cu}$ -QT-NPs and  $^{64}\text{Cu}$ -QT-BSA-NPs. All the data are represented with the mean  $\pm$  standard deviation (n = 3)

| Sample                       | Time | Organ (%ID/g)   |                 |                  |                 |
|------------------------------|------|-----------------|-----------------|------------------|-----------------|
|                              |      | Tumor           | Muscle          | Liver            | Blood           |
| $^{64}\text{Cu}$ -QT-NPs     | 2 h  | $0.71 \pm 0.10$ | $0.63 \pm 0.12$ | $29.4 \pm 13.47$ | $0.55 \pm 0.03$ |
|                              | 6 h  | $1.40 \pm 0.29$ | $0.65 \pm 0.12$ | $28.6 \pm 11.00$ | $0.56 \pm 0.03$ |
|                              | 24 h | $2.13 \pm 0.25$ | $0.57 \pm 0.06$ | $25.6 \pm 10.54$ | $0.55 \pm 0.10$ |
|                              | 48 h | $2.43 \pm 0.60$ | $0.53 \pm 0.16$ | $23.1 \pm 10.27$ | $0.45 \pm 0.02$ |
| $^{64}\text{Cu}$ -QT-NPs/BSA | 2 h  | $0.96 \pm 0.36$ | $0.60 \pm 0.07$ | $38.6 \pm 5.34$  | $0.70 \pm 0.10$ |
|                              | 6 h  | $1.80 \pm 0.20$ | $0.76 \pm 0.14$ | $35.0 \pm 6.36$  | $0.93 \pm 0.18$ |
|                              | 24 h | $4.53 \pm 0.51$ | $1.35 \pm 0.10$ | $29.0 \pm 5.73$  | $1.25 \pm 0.10$ |
|                              | 48 h | $4.93 \pm 0.81$ | $1.60 \pm 0.32$ | $22.9 \pm 2.52$  | $1.23 \pm 0.19$ |

181 **Table S3** Size distribution of Cu-QT-NPs and Cu-QT-NPs/BSA in saline.

| Samples       | Particle size              |
|---------------|----------------------------|
| Cu-QT-NPs     | 585 nm $\pm$ 102 * (0.669) |
| Cu-QT-NPs/BSA | 186 nm $\pm$ 38 * (0.356)  |

182 \* PDI: Polydispersity index is shown in parentheses

183

184 **Table S4** Liver toxicity results for QT nanoparticles from our previous *in-vivo* studies.

| Particles | Analysis                                      | Toxicity                                                                            | Ref. |
|-----------|-----------------------------------------------|-------------------------------------------------------------------------------------|------|
| QT        | ALT <sup>1)</sup> and AST <sup>2)</sup> level | No significant difference within normal range (ALT: 7-227 (U/L), AST: 37-329 (U/L)) | [15] |
| MTX-QT    | ALT and AST level                             | No significant difference within normal range (ALT: 7-227 (U/L), AST: 37-329 (U/L)) | [15] |
| QT        | Concentration of Mg, Al in liver              | No significant difference with control                                              | [15] |
| MTX-QT    | Concentration of MTX in liver                 | No significant difference with control                                              | [15] |
| MTX-QT    | Concentration of MTX in liver                 | No significant difference with control                                              | [16] |

185 1) ALT: alanine aminotransferase, 2) AST: aspartate aminotransferase

186

187

## 188 References

- 189 [1] S. Shi, B. C. Fliss, Z. Gu, Y. Zhu, H. Hong, H. F. Valdovinos, R. Hernandez, S. Goel, H.  
 190 Luo, F. Chen, T. E. Barnhart, R. J. Nickles and Z. P. Xu, *Sci. Rep.*, 2015, **5**, 16930.
- 191 [2] “Decay Scheme of  $^{64}\text{Cu}$  radioisotope.”, Retrieved 16 November 2020.  
 192 [https://www.nucleonica.com/wiki/index.php?title=Decay\\_Schemes](https://www.nucleonica.com/wiki/index.php?title=Decay_Schemes)
- 193 [3] J. Y. Kim, H. Park, J. C. Lee, K. M. Kim, K. C. Lee, H. J. Ha, T. H. Choi, G. I. An and G.  
 194 J. Choen, *Appl. Radiat. Isot.*, 2009, **67**, 1190–1194.
- 195 [4] E. Caldera, B. Weigel, V. N. Kucharczyk, K. S. Sellins, S. L. Archibeque, J. J. Wagner,  
 196 H. Han, W. S. Jerry and T. E. Engle, *J. Anim. Sci.*, 2019, **97**, 1852–1864.
- 197 [5] S. R. Banerjee, M. Pullambhatla, C. A. Foss, S. Nimmagadda, R. Ferdani, C. J. Anderson,  
 198 R. C. Mease and M. G. Pomper, *J. Med. Chem.*, 2014, **57**, 2657–2669.
- 199 [6] A. F. Prasanphanich, P. K. Nanda, T. L. Rold, L. Ma, M. R. Lewis, J. C. Garrison, T. J.  
 200 Hoffman, G. L. Sieckman, S. D. Figueroa and C. J. Smith, *Proc. Natl. Acad. Sci.*, 2007,  
 201 **104**, 12462–12467.
- 202 [7] J. R. Merrill, K. Krajewski, H. Yuan, J. E. Frank, D. S. Lalush, C. Patterson and A. N.  
 203 Veleva, *Biomaterials*, 2016, **84**, 241–249.
- 204 [8] W. Ma, F. Fu, J. Zhu, R. Huang, Y. Zhu, Z. Liu, J. Wang, P. S. Conti, X. Shi and K.  
 205 Chen, *Nanoscale*, 2018, **10**, 6113–6124.
- 206 [9] S. C. Ghosh, K. L. Pinkston, H. Robinson, B. R. Harvey, N. Wilganowski, K. Gore, E. M.  
 207 Sevick-Muraca and A. Azhdarinia, *Nucl. Med. Biol.*, 2015, **42**, 177–183.

- 208 [10]L. A. Bass, M. Wang, M. J. Welch and C. J. Anderson, *Bioconju. Chem.*, 2000, **11**, 527–  
209 532.
- 210 [11]M. S. Cooper, M. T. Ma, K. Sunassee, K. P. Shaw, J. D. Williams, R. L. Paul, P. S.  
211 Donnelly and P. J. Blower, *Bioconju. Chem.*, 2012, **23**, 1029–1039.
- 212 [12]C. Glaus, R. Rossin, M. J. Welch and G. Bao, *Bioconju. Chem.*, 2010, **21**, 715–722.
- 213 [13]H. Xie, B. Goins, A. Bao, Z. J. Wang and W. T. Phillips, *Int. J. Nanomed.*, 2012, **7**,  
214 2227–2238.
- 215 [14]K. Cheng, S. R. Kothapalli, H. Liu, A. L. Koh, J. V. Jokerst, H. Jiang, M. Yang, J. Li, J.  
216 Levi, J. C. Wu, S. S. Gambhir and Z. Cheng, *J. Am. Chem. Soc.*, 2014, **136**, 3560–3571.
- 217 [15]G. Choi, H. Piao, Z. A. Allothman, A. Vinu, C. O. Yun and J. H. Choy, *Int. J. Nanomed.*,  
218 2016, **11**, 337–348.
- 219 [16]G. Choi, O. Y. Kwon, Oh, C. O. Yun and J. H. Choy, *Sci. Rep.*, 2014, **4**, 1–7.
